# Supplementary material for: Competence Classification of Cumulus and Granulosa Cell Transcriptome in Embryos Matched by Morphology and Female Age
Source: PubMed Central journal article supplement (PMC4851390; doi:10.1371/journal.pone.0153562), 2016-04-29
Supplement: pone.0153562.s003.pdf [file pone.0153562.s003.pdf]

**S1 Table. Patient demographics and baseline characteristics.**

|                                           | Live Birth | No pregnancy | p-value |
|-------------------------------------------|------------|--------------|---------|
| Age (years) <sup>a</sup>                  | 31.9 ±2.9  | 33.1±2.4     | 0.22    |
| Number of oocytes (no) <sup>a</sup>       | 10.1±5.2   | 10,8±4.7     | 0.72    |
| Total FSH dose (IU) <sup>a</sup>          | 1538±150   | 1447±203     | 0.16    |
| Treatment lenght (days) <sup>a</sup>      | 10.3±1.0   | 9.6±1.4      | 0.15    |
| Primary cause of infertility <sup>b</sup> |            |              |         |
| Female factor                             | 7 (43.8)   | 8 (50.0)     | 0.92    |
| Male factor                               | 3 (18.3)   | 3 (18.3)     | 0.92    |
| Unexplained                               | 6 (37.5)   | 5 (31.3)     | 0.92    |

**S1 Table. Patient demographics and baseline characteristics.** Data are shown as mean ±SD or number (column percentage). p<0.05 is considered significant. <sup>a</sup>t-test. <sup>b</sup>chi-squared test .

**S2 Table. Performance of three different classification algorithms applied during CC microarray data analysis.**

| Normalized data | Classification Model p < 0.01 | Accuracy (%) | Accuracy / class (%) | Sensitivity | Specificity | PPV   | NPV   | # PS |
|-----------------|-------------------------------|--------------|----------------------|-------------|-------------|-------|-------|------|
| PLIER unlog LB  | LDA                           | 59           | 33                   | 0.417       | 0.733       | 0.556 | 0.611 | 82   |
| PLIER unlog NP  | LDA                           | 59           | 73                   | 0.733       | 0.417       | 0.611 | 0.556 | 82   |
| PLIER unlog LB  | 3 NN                          | 85           | 92                   | 0.917       | 0.8         | 0.786 | 0.923 | 82   |
| PLIER unlog NP  | 3 NN                          | 85           | 80                   | 0.8         | 0.917       | 0.923 | 0.786 | 82   |
| PLIER unlog LB  | SVM linear                    | 81           | 83                   | 0.833       | 0.8         | 0.769 | 0.857 | 82   |
| PLIER unlog NP  | SVM linear                    | 81           | 80                   | 0.8         | 0.833       | 0.857 | 0.769 | 82   |

Classification algorithms were trained on PLIER normalized data. Only annotated probe sets from the array were included in the analysis. Performance parameters for each classification model were estimated using leave one out cross-validation.

**S3 Table. Performance of three different classification algorithms applied during MGC microarray data analysis.**

| Normalized data | Classification Model p < 0.05 | Accuracy (%) | Accuracy / class (%) | Sensitivity (%) | Specificity (%) | PPV (%) | NPV (%) | # PS |
|-----------------|-------------------------------|--------------|----------------------|-----------------|-----------------|---------|---------|------|
| PLIER unlog LB  | LDA                           | 37           | 22                   | 0.222           | 0.5             | 0.286   | 0.417   | 48   |
| PLIER unlog NP  | LDA                           | 37           | 50                   | 0.5             | 0.222           | 0.417   | 286     | 48   |
| PLIER unlog LB  | 3 NN                          | 11           | 11                   | 0.111           | 0.1             | 0.1     | 0.111   | 48   |
| PLIER unlog NP  | 3 NN                          | 11           | 10                   | 0.1             | 0.111           | 0.111   | 0.1     | 48   |
| PLIER unlog LB  | SVM linear                    | 26           | 22                   | 0.222           | 0.3             | 0.222   | 0.3     | 48   |
| PLIER unlog NP  | SVM linear                    | 26           | 30                   | 0.3             | 0.222           | 0.3     | 0.222   | 48   |

Classification algorithms were trained on PLIER normalized data. Only annotated probe sets from the array were included in the analysis. Performance parameters for each classification model were estimated using leave one out cross-validation.

**S1 Figure. ROC curve showing the true positive rate versus false positive rate of the validation data sets.**

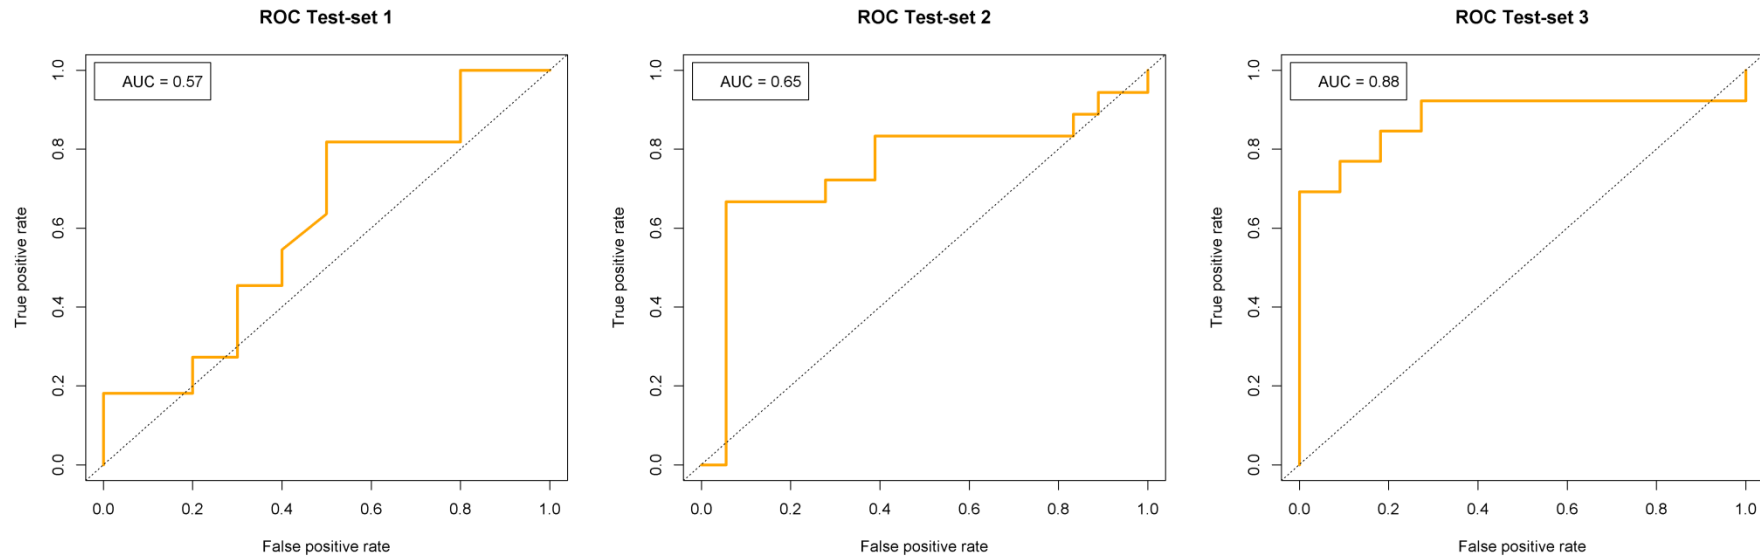

Receiver operating characteristic (ROC) curve for the binary classifiers ability to distinguish between oocytes that reached the blastocyst (B) stage and embryos of poor quality (EP) in the validation sub-sets. The curve shows the true positive rate versus false positive rate, i.e. the tradeoff between sensitivity and specificity. The area under the curve (AUC), which captures the ability of the classifier to correctly group the samples according to predicted live birth, is shown for each part of the validation data. The AUC of 1.0, whereas an AUC value of 0.5 indicates that the classification is random.

**S4 Table. CC gene signature statistics.**

| Gene Symbol | Gene Title                                                | P value | Mean LB | Mean NP | FC-sign | % CV-supp |
|-------------|-----------------------------------------------------------|---------|---------|---------|---------|-----------|
| GAL         | galanin prepropeptide                                     | 0.005   | 107.68  | 237.26  | -2.20   | 100       |
| BGN         | biglycan                                                  | 0.001   | 41.03   | 63.72   | -1.55   | 100       |
| NR2F1       | nuclear receptor subfamily 2, group F, member 1           | 0.002   | 35.02   | 48.65   | -1.39   | 100       |
| BTNL2       | butyrophilin-like 2 (MHC class II associated)             | 0.002   | 9.99    | 12.90   | -1.29   | 100       |
| FLNA        | filamin A, alpha                                          | 0.001   | 227.34  | 293.24  | -1.29   | 100       |
| RXFP3       | relaxin/insulin-like family peptide receptor 3            | 0.001   | 10.75   | 13.69   | -1.27   | 100       |
| AMER3       | APC membrane recruitment protein 3                        | 0.001   | 14.39   | 18.04   | -1.25   | 100       |
| RFXAP       | regulatory factor X-associated protein                    | 0.003   | 10.20   | 12.65   | -1.24   | 100       |
| FN1         | fibronectin 1                                             | 0.003   | 1841.19 | 2272.65 | -1.23   | 100       |
| HNRNPA1P12  | heterogeneous nuclear ribonucleoprotein A1 pseudogene 12  | 0.005   | 208.09  | 177.08  | 1.18    | 100       |
| NACA2       | nascent polypeptide-associated complex alpha subunit 2    | 0.001   | 339.09  | 269.99  | 1.26    | 100       |
| MT-TF       | mitochondrially encoded tRNA phenylalanine                | 0.003   | 1719.58 | 1309.21 | 1.31    | 100       |
| PEX1        | peroxisomal biogenesis factor 1                           | 0.005   | 21.93   | 16.83   | 1.30    | 96        |
| DQX1        | DEAQ box RNA-dependent ATPase 1                           | 0.005   | 12.32   | 8.76    | 1.41    | 93        |
| VOPP1       | vesicular, overexpressed in cancer, prosurvival protein 1 | 0.005   | 29.58   | 37.88   | -1.28   | 89        |
| MGRN1       | mahogunin, ring finger 1                                  | 0.005   | 56.26   | 68.25   | -1.21   | 89        |
| SOCS6       | suppressor of cytokine signaling 6                        | 0.005   | 23.85   | 18.61   | 1.28    | 89        |
| ECI1        | enoyl-CoA delta isomerase 1                               | 0.006   | 26.84   | 33.44   | -1.25   | 81        |
| MRC2        | mannose receptor, C type 2                                | 0.006   | 23.08   | 32.97   | -1.43   | 78        |
| COL4A1      | collagen, type IV, alpha 1                                | 0.006   | 171.73  | 227.28  | -1.32   | 67        |
| GUCY1A2     | guanylate cyclase 1, soluble, alpha 2                     | 0.007   | 27.86   | 40.76   | -1.46   | 59        |
| NTRK2       | neurotrophic tyrosine kinase, receptor, type 2            | 0.007   | 8.66    | 11.15   | -1.29   | 56        |
| DCLK1       | doublecortin-like kinase 1                                | 0.009   | 22.18   | 37.30   | -1.68   | 48        |
| RAB33A      | RAB33A, member RAS oncogene family                        | 0.008   | 13.13   | 22.02   | -1.68   | 44        |
| CCDC97      | coiled-coil domain containing 97                          | 0.009   | 31.93   | 38.34   | -1.20   | 44        |
| LAMP5       | lysosomal-associated membrane protein family, member 5    | 0.008   | 12.07   | 16.48   | -1.37   | 41        |
| KIFC3       | kinesin family member C3                                  | 0.008   | 12.48   | 15.77   | -1.26   | 41        |
| NMUR1       | neuromedin U receptor 1                                   | 0.009   | 16.43   | 20.28   | -1.23   | 41        |
| TCF21       | transcription factor 21                                   | 0.009   | 10.36   | 21.74   | -2.10   | 37        |
| LGALS14     | lectin, galactoside-binding, soluble, 14                  | 0.009   | 8.87    | 12.09   | -1.36   | 33        |

**Gene symbol and statistics for the 30 genes that constitute the cumulus cell classifier signature.** FC-sign refers to the average directional fold change between the group of LB and NP patients. % CV-supp refers to the percentage of leave-one-out cross validation rounds where the particular gene was selected.

S2 Figure. Hierarchical cluster visualization of the 30 genes in the CC signature.

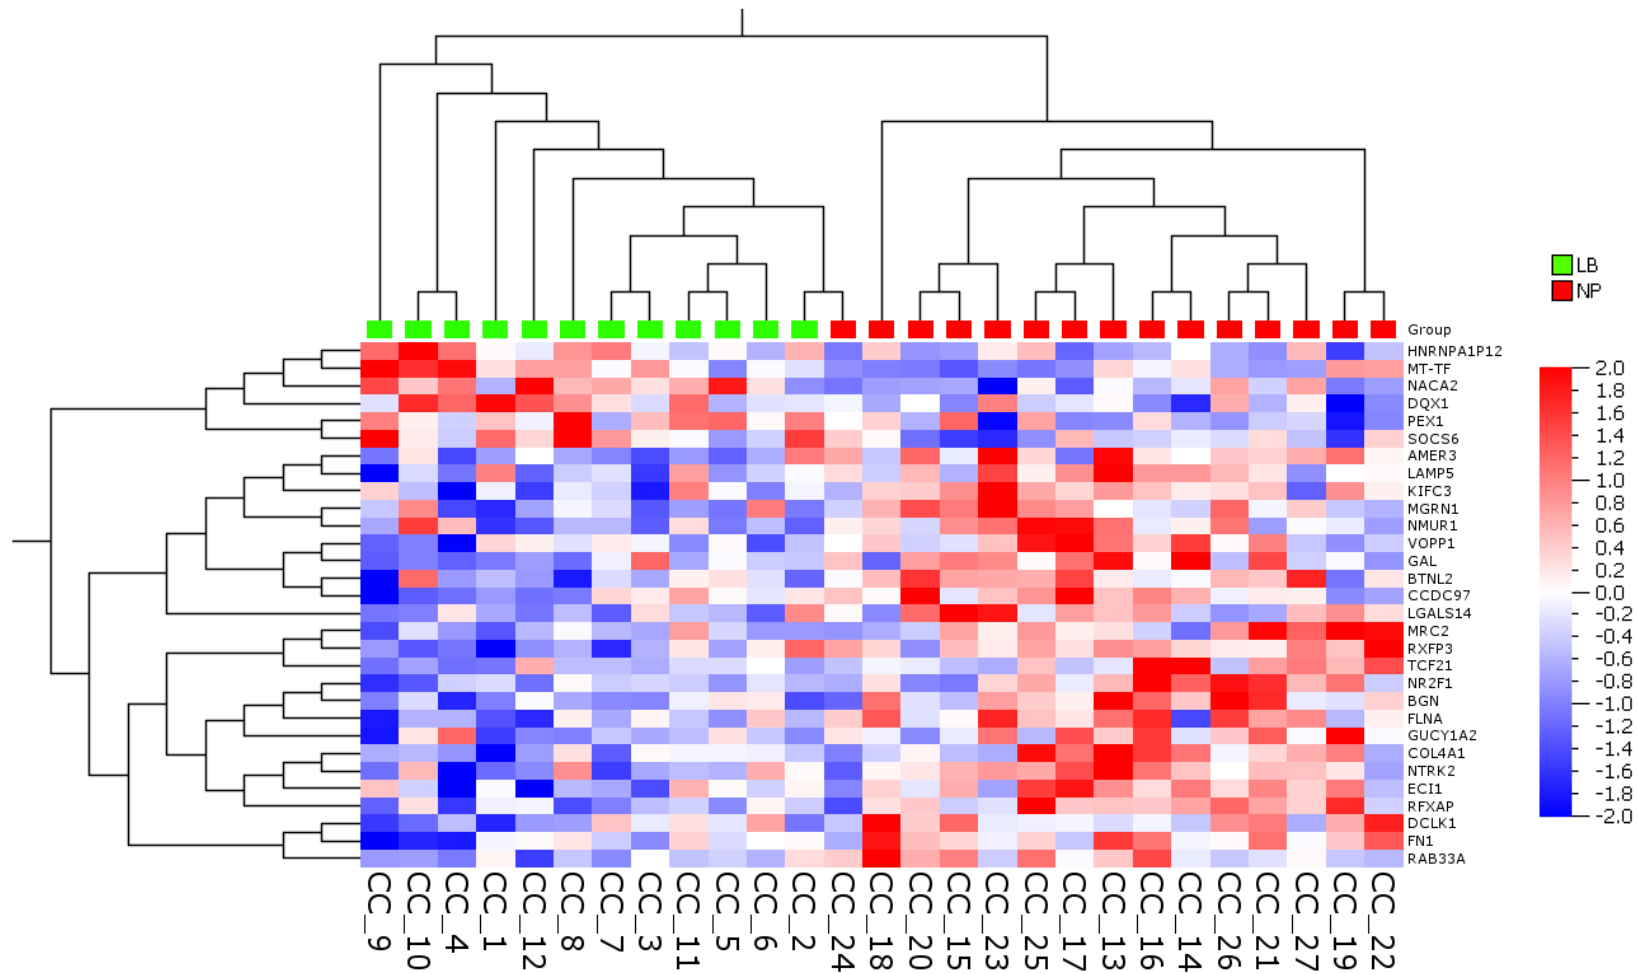

**Hierarchical cluster visualization of the gene expression pattern of CC classifier signature.** Relative expression level is indicated by pseudo colors where red is up regulated and blue is down regulated compared to the mean. The intensity of the color is determined by standard deviation from the mean as shown in the color bar to the right. LB samples are labeled by green and NP samples are labeled by red. The two-way clustering was performed using average linkage clustering and Euclidean distance.

| Diseases or Functions Annotation | P value  | Predicted Activation | Activation z-score | Molecules                                             | # Molecules |
|----------------------------------|----------|----------------------|--------------------|-------------------------------------------------------|-------------|
| migration of cells               | 1.45E-02 | Decreased            | -2.012             | BGN,COL4A1,DCLK1,FLNA,FN1,MRC2,NR2F1,NTRK2            | 8           |
| quantity of neurons              | 1.56E-04 |                      | -1.78              | DCLK1,FLNA,GAL,NR2F1,NTRK2                            | 5           |
| organization of cytoplasm        | 5.11E-04 |                      | -1.534             | DCLK1,FLNA,FN1,GAL,KIFC3,NR2F1,NTRK2,PEX1,RAB33A      | 9           |
| microtubule dynamics             | 5.14E-04 |                      | -1.533             | DCLK1,FLNA,FN1,GAL,KIFC3,NR2F1,NTRK2,RAB33A           | 8           |
| growth of neurites               | 7.22E-04 |                      | -0.655             | DCLK1,FN1,GAL,NTRK2,RAB33A                            | 5           |
| mass of organism                 | 3.12E-03 |                      | 0                  | GAL,NMUR1,NTRK2,SOCS6                                 | 4           |
| apoptosis of tumor cell lines    | 2.79E-02 |                      | 0.834              | COL4A1,FN1,GAL,KIFC3,NTRK2,VOPP1                      | 6           |
| apoptosis of neurons             | 5.05E-03 |                      | 1.938              | FN1,GAL,NR2F1,NTRK2                                   | 4           |
| Bleeding                         | 8.89E-03 |                      | 1.98               | BGN,COL4A1,FLNA,FN1                                   | 4           |
| Edema                            | 3.73E-03 |                      | 1.982              | FLNA,FN1,GAL,NTRK2                                    | 4           |
| apoptosis                        | 1.82E-02 | Increased            | 3.032              | BGN,COL4A1,FLNA,FN1,GAL,KIFC3,NR2F1,NTRK2,TCF21,VOPP1 | 10          |

**S5 Table. Functional enrichment and Predicted activation score.** Biological functions with significant z-scores above 2 or below -2 are marked.
