# Supplementary material for: Competence Classification of Cumulus and Granulosa Cell Transcriptome in Embryos Matched by Morphology and Female Age
Source: PubMed Central journal article supplement (PMC4851390; doi:10.1371/journal.pone.0153562), 2016-04-29
Supplement: pone.0153562.s006.pdf [file pone.0153562.s006.pdf]

**S4 Table. CC gene signature statistics.**

| Gene Symbol | Gene Title                                                | P value | Mean LB | Mean NP | FC-sign | % CV-supp |
|-------------|-----------------------------------------------------------|---------|---------|---------|---------|-----------|
| GAL         | galanin prepropeptide                                     | 0.005   | 107.68  | 237.26  | -2.20   | 100       |
| BGN         | biglycan                                                  | 0.001   | 41.03   | 63.72   | -1.55   | 100       |
| NR2F1       | nuclear receptor subfamily 2, group F, member 1           | 0.002   | 35.02   | 48.65   | -1.39   | 100       |
| BTNL2       | butyrophilin-like 2 (MHC class II associated)             | 0.002   | 9.99    | 12.90   | -1.29   | 100       |
| FLNA        | filamin A, alpha                                          | 0.001   | 227.34  | 293.24  | -1.29   | 100       |
| RXFP3       | relaxin/insulin-like family peptide receptor 3            | 0.001   | 10.75   | 13.69   | -1.27   | 100       |
| AMER3       | APC membrane recruitment protein 3                        | 0.001   | 14.39   | 18.04   | -1.25   | 100       |
| RFXAP       | regulatory factor X-associated protein                    | 0.003   | 10.20   | 12.65   | -1.24   | 100       |
| FN1         | fibronectin 1                                             | 0.003   | 1841.19 | 2272.65 | -1.23   | 100       |
| HNRNPA1P12  | heterogeneous nuclear ribonucleoprotein A1 pseudogene 12  | 0.005   | 208.09  | 177.08  | 1.18    | 100       |
| NACA2       | nascent polypeptide-associated complex alpha subunit 2    | 0.001   | 339.09  | 269.99  | 1.26    | 100       |
| MT-TF       | mitochondrially encoded tRNA phenylalanine                | 0.003   | 1719.58 | 1309.21 | 1.31    | 100       |
| PEX1        | peroxisomal biogenesis factor 1                           | 0.005   | 21.93   | 16.83   | 1.30    | 96        |
| DQX1        | DEAQ box RNA-dependent ATPase 1                           | 0.005   | 12.32   | 8.76    | 1.41    | 93        |
| VOPP1       | vesicular, overexpressed in cancer, prosurvival protein 1 | 0.005   | 29.58   | 37.88   | -1.28   | 89        |
| MGRN1       | mahogunin, ring finger 1                                  | 0.005   | 56.26   | 68.25   | -1.21   | 89        |
| SOCS6       | suppressor of cytokine signaling 6                        | 0.005   | 23.85   | 18.61   | 1.28    | 89        |
| ECI1        | enoyl-CoA delta isomerase 1                               | 0.006   | 26.84   | 33.44   | -1.25   | 81        |
| MRC2        | mannose receptor, C type 2                                | 0.006   | 23.08   | 32.97   | -1.43   | 78        |
| COL4A1      | collagen, type IV, alpha 1                                | 0.006   | 171.73  | 227.28  | -1.32   | 67        |
| GUCY1A2     | guanylate cyclase 1, soluble, alpha 2                     | 0.007   | 27.86   | 40.76   | -1.46   | 59        |
| NTRK2       | neurotrophic tyrosine kinase, receptor, type 2            | 0.007   | 8.66    | 11.15   | -1.29   | 56        |
| DCLK1       | doublecortin-like kinase 1                                | 0.009   | 22.18   | 37.30   | -1.68   | 48        |
| RAB33A      | RAB33A, member RAS oncogene family                        | 0.008   | 13.13   | 22.02   | -1.68   | 44        |
| CCDC97      | coiled-coil domain containing 97                          | 0.009   | 31.93   | 38.34   | -1.20   | 44        |
| LAMP5       | lysosomal-associated membrane protein family, member 5    | 0.008   | 12.07   | 16.48   | -1.37   | 41        |
| KIFC3       | kinesin family member C3                                  | 0.008   | 12.48   | 15.77   | -1.26   | 41        |
| NMUR1       | neuromedin U receptor 1                                   | 0.009   | 16.43   | 20.28   | -1.23   | 41        |
| TCF21       | transcription factor 21                                   | 0.009   | 10.36   | 21.74   | -2.10   | 37        |
| LGALS14     | lectin, galactoside-binding, soluble, 14                  | 0.009   | 8.87    | 12.09   | -1.36   | 33        |

**Gene symbol and statistics for the 30 genes that constitute the cumulus cell classifier signature.** FC-sign refers to the average directional fold change between the group of LB and NP patients. % CV-supp refers to the percentage of leave-one-out cross validation rounds where the particular gene was selected.
