# Supplementary material for: Competence Classification of Cumulus and Granulosa Cell Transcriptome in Embryos Matched by Morphology and Female Age
Source: PubMed Central journal article supplement (PMC4851390; doi:10.1371/journal.pone.0153562), 2016-04-29
Supplement: pone.0153562.s007.pdf [file pone.0153562.s007.pdf]

S5 Table. Functional enrichment and Predicted activation score.

| Diseases or Functions Annotation | P value         | Predicted Activation | Activation z-score | Molecules                                                    | # Molecules |
|----------------------------------|-----------------|----------------------|--------------------|--------------------------------------------------------------|-------------|
| migration of cells               | 1.45E-02        | Decreased            | -2.012             | BGN,COL4A1,DCLK1,FLNA,FN1,MRC2,NR2F1,NTRK2                   | 8           |
| quantity of neurons              | 1.56E-04        |                      | -1.78              | DCLK1,FLNA,GAL,NR2F1,NTRK2                                   | 5           |
| organization of cytoplasm        | 5.11E-04        |                      | -1.534             | DCLK1,FLNA,FN1,GAL,KIFC3,NR2F1,NTRK2,PEX1,RAB33A             | 9           |
| microtubule dynamics             | 5.14E-04        |                      | -1.533             | DCLK1,FLNA,FN1,GAL,KIFC3,NR2F1,NTRK2,RAB33A                  | 8           |
| growth of neurites               | 7.22E-04        |                      | -0.655             | DCLK1,FN1,GAL,NTRK2,RAB33A                                   | 5           |
| mass of organism                 | 3.12E-03        |                      | 0                  | GAL,NMUR1,NTRK2,SOCS6                                        | 4           |
| apoptosis of tumor cell lines    | 2.79E-02        |                      | 0.834              | COL4A1,FN1,GAL,KIFC3,NTRK2,VOPP1                             | 6           |
| apoptosis of neurons             | 5.05E-03        |                      | 1.938              | FN1,GAL,NR2F1,NTRK2                                          | 4           |
| Bleeding                         | 8.89E-03        |                      | 1.98               | BGN,COL4A1,FLNA,FN1                                          | 4           |
| Edema                            | 3.73E-03        |                      | 1.982              | FLNA,FN1,GAL,NTRK2                                           | 4           |
| <b>apoptosis</b>                 | <b>1.82E-02</b> | <b>Increased</b>     | <b>3.032</b>       | <b>BGN,COL4A1,FLNA,FN1,GAL,KIFC3,NR2F1,NTRK2,TCF21,VOPP1</b> | <b>10</b>   |

Biological functions with significant z-scores above 2 or below -2 are marked.
